# Supplementary material
Source: Springer Nature journal article supplement (https://www.springermedizin.de/resource/supplementary/13058_2008_2220_MOESM3_ESM.pdf/9700920)

**Supplementary Figure 1B.** Correlating changes in *in vivo* mammary glands, of genes up-regulated (upper panel) or down-regulated (lower panel), respectively, during differentiation of HC11 cells. Average of 3-5 mice in each stage.

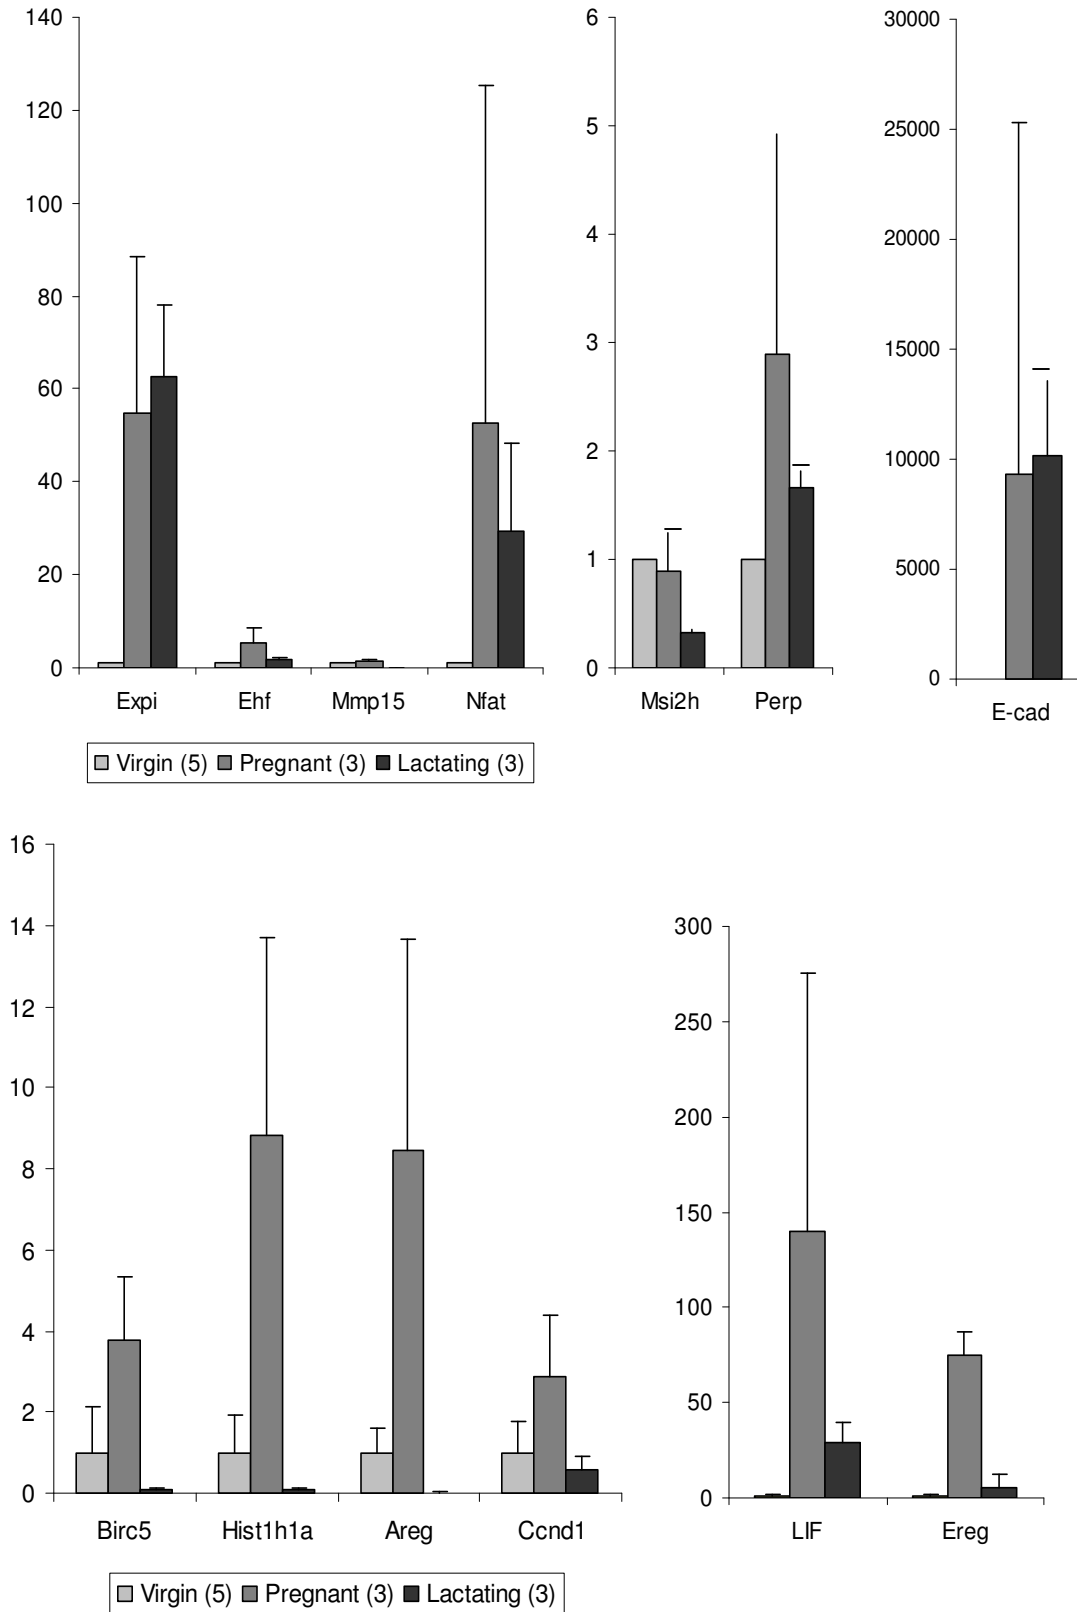

Supplement: MOESM3 [file 9700920]
